# Supplementary material
Source: Research Square preprint supplement (doi:10.21203/rs.3.rs-9612344/v1)
Supplement: Supplementary file 1 [file 5e234dc7a3948206ed4028d7.xlsx]

## Sheet: Sheet1
Section	Item No.	PRISMA-ScR checklist item	Reported?	Location in manuscript	Author response / notes
Title	1	Identify the report as a scoping review.	Yes	Title page	The title identifies the article as a scoping review.
Abstract	2	Provide a structured summary that includes, as applicable: background, objectives, eligibility criteria, sources of evidence, charting methods, results, and conclusions that relate to the review questions and objectives.	Yes	Abstract	The abstract includes background, objective, methods, results, and conclusion.
Introduction	3	Describe the rationale for the review in the context of what is already known and explain why a scoping review approach is appropriate.	Yes	Introduction; Background and Theoretical Foundations	The manuscript explains the implementation gap and the need to synthesise clinical, technical, AI, and governance evidence.
Introduction	4	Provide an explicit statement of the questions and objectives being addressed, with reference to their key elements.	Yes	Section 3.2 Review Questions	RQ1–RQ4 are explicitly stated and aligned with the review objectives.
Methods	5	Indicate whether a review protocol exists; state if and where it can be accessed, or state that no protocol was registered.	Not applicable / addressed	Methods	No protocol registration is reported. Recommended manuscript sentence if needed: 'No review protocol was registered for this scoping review.'
Methods	6	Specify characteristics of the sources of evidence used as eligibility criteria and provide a rationale.	Yes	Section 3.3 Eligibility Criteria	Eligibility criteria include publication window, publication type, focus areas, methodological/technical/conceptual detail, and exclusion criteria.
Methods	7	Describe all information sources used in the search, including databases, additional sources, and date coverage where relevant.	Yes	Section 3.4 Information Sources and Search Strategy	Databases and additional targeted sources are listed, including PubMed/MEDLINE, Web of Science, Scopus, IEEE Xplore, ACM Digital Library, JMIR, JAMIA, Nature Portfolio journals, AMIA proceedings, ACL Anthology, and arXiv.
Methods	8	Present the full electronic search strategy for at least one database, including any limits used, so that it could be repeated.	Partly / substantially reported	Section 3.4 Information Sources and Search Strategy	Representative search strings and database-specific adaptation are described. If the journal requests strict reproducibility, provide full database-specific search strings as supplementary material.
Methods	9	State the process for selecting sources of evidence, including screening and eligibility steps.	Yes	Section 3.5 Study Selection; Fig. 1	The manuscript reports de-duplication, title/abstract screening, full-text assessment, and final inclusion.
Methods	10	Describe the methods of charting data from included sources of evidence and any processes for obtaining or confirming data.	Yes	Section 3.6 Data Extraction; Table 2	A structured data extraction/charting form is described, including bibliographic details, study type, domain, setting, objectives, barriers, proposed solutions, relevance, and synthesis notes.
Methods	11	List and define all variables for which data were sought and any assumptions or simplifications made.	Yes	Section 3.6 Data Extraction; Table 2	Variables are listed in the data extraction framework.
Methods	12	If critical appraisal of individual sources was done, provide the rationale and describe the methods used and how this information was used in synthesis. This is an optional PRISMA-ScR item.	Yes / optional item	Section 3.7 Quality Appraisal	A fit-for-purpose quality appraisal approach is described for heterogeneous evidence types. Studies were not excluded based on appraisal alone.
Methods	13	Describe the methods of handling and summarising/charting the data that were extracted.	Yes	Section 3.8 Data Synthesis	Narrative thematic synthesis is described, including open coding, grouping into higher-order domains, and comparative interpretation of cross-domain relationships.
Results	14	Give numbers of sources of evidence screened, assessed for eligibility, and included in the review, with reasons for exclusions at each stage, ideally using a flow diagram.	Yes	Section 3.5 Study Selection; Fig. 1; Table 1	The manuscript reports 348 records identified, 341 screened after duplicate removal, 70 full-text records assessed, 21 excluded, and 49 included.
Results	15	For each source of evidence, present characteristics for which data were charted and provide citations.	Yes	Multimedia Appendix 1; Table 4	The appendix provides study characteristics including author/year, design, domain, analytical assignment, and key finding/barrier.
Results	16	If critical appraisal was done, present data on critical appraisal of included sources. This is an optional PRISMA-ScR item.	Addressed narratively / optional item	Section 3.7 Quality Appraisal	The appraisal approach is described narratively. No numerical quality score table is presented, which is reasonable for heterogeneous scoping review evidence.
Results	17	For each included source of evidence, present the relevant data that were charted and that relate to the review questions and objectives.	Yes	Multimedia Appendix 1; Table 4	The appendix presents charted data and key barriers/findings for the included studies.
Results	18	Summarise and/or present the charting results as they relate to the review questions and objectives.	Yes	Section 4 Results; Sections 4.2–4.5; Figs. 2–3; Table 3	Results are organised around barrier domains, cross-stage fragmentation patterns, maturity gaps, and integrated synthesis.
Discussion	19	Summarise the main results, including an overview of concepts, themes, and types of evidence available; link to the review questions and objectives; and consider relevance to key groups.	Yes	Section 5.1 Principal Findings; Sections 5.2–5.5	The discussion summarises the main findings and interprets them across domains, digital tools, limitations, and the proposed Guideline-as-Guardrail model.
Discussion	20	Discuss the limitations of the scoping review process.	Yes	Section 5.6 Strengths and Limitations	The manuscript discusses limitations including restriction to recent literature, heterogeneity of evidence, narrative synthesis, and lack of empirical validation of the proposed model.
Discussion	21	Provide a general interpretation of the results in relation to other evidence, and discuss implications for future research, practice, or policy.	Yes	Sections 5.5–5.7; Section 6 Conclusion	The manuscript provides implications for computable guideline integration, AI governance, clinical workflows, policy, and future evaluation.
Funding	22	Describe sources of funding for the included sources of evidence and for the scoping review; describe the role of funders.	Yes	Declarations: Funding	The manuscript states that the research received no external funding. Funding of included sources was not separately analysed, which is acceptable unless specifically required by the journal.
